# Supplementary material for: Efficient van der Waals layered gallium telluride-based passive photodetectors for low-power-density sensing of visible light
Source: Royal Society of Chemistry journal article supplement (doi:10.1039/d3tc01958f), 2023-01-01
Supplement: d3tc01958f1.pdf [file d3tc01958f1.pdf]

## Supplementary Data

Efficient van der Waals layered gallium telluride-based passive photodetector for  
low-power-density sensing of visible light

*Carlo C. Sta. Maria<sup>1</sup>, Po-Hung Wu<sup>2</sup>, Denny Pratama Hasibuan<sup>1</sup>, Clara Sinta Saragih<sup>1</sup>, Hien Giap<sup>1</sup>, Duc Huy Nguyen<sup>1</sup>, Yan-Ruei Chen<sup>4</sup>, Ranjit A. Patil<sup>1,\*\*</sup>, Duy Van Pham<sup>1</sup>, Ji-Lin Shen<sup>3</sup>, Chien-Chih Lai<sup>1</sup>, Maw-Kuen Wu<sup>4</sup>, and Yuan-Ron Ma<sup>1,5\*</sup>*

<sup>1</sup>Department of Physics, National Dong Hwa University, Hualien 97401, Taiwan

<sup>2</sup>Department of Electrical Engineering, National Dong Hwa University, Hualien 97401, Taiwan

<sup>3</sup>Department of Physics, Chung Yuan Christian University, Taoyuan 32023, Taiwan

<sup>4</sup>Institute of Physics, Academia Sinica, Taipei 11529, Taiwan

<sup>5</sup>Office of Postgraduate Studies, UCSI University, Kuala Lumpur 56000, Malaysia

\*Correspondence: [ronma@gms.ndhu.edu.tw](mailto:ronma@gms.ndhu.edu.tw)

\*\*Co-correspondence: [ranajit27@gmail.com](mailto:ranajit27@gmail.com)

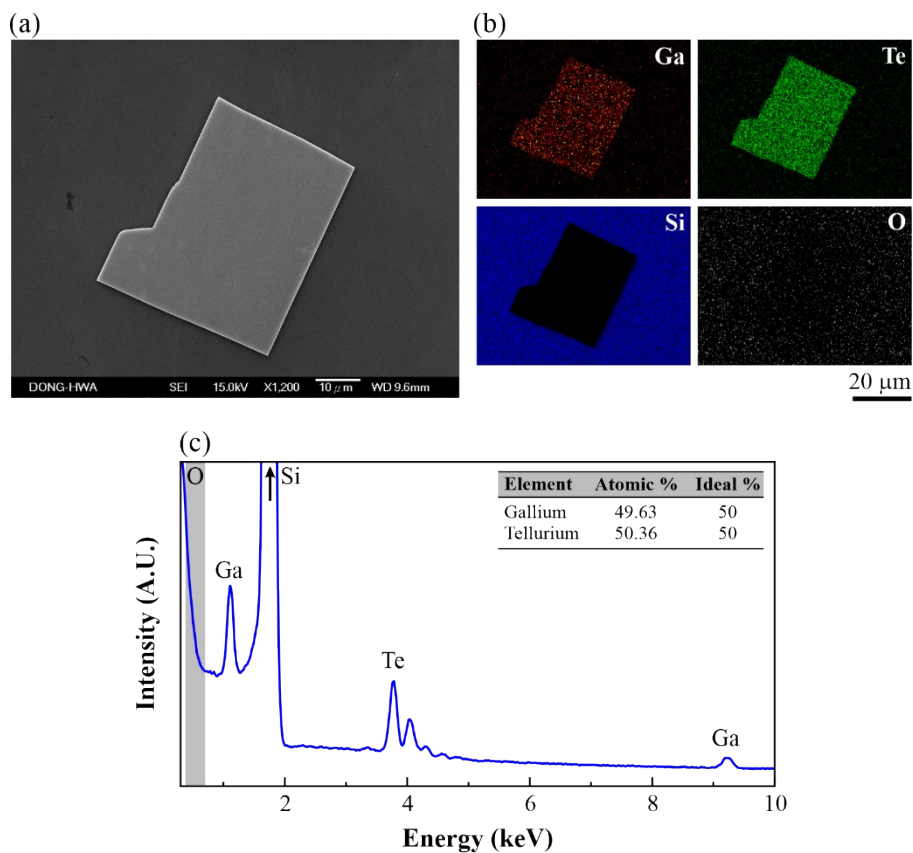

**Figure S1.** EDX analysis of vdW layered GaTe single crystal flake. (a) SEM image of an exfoliated GaTe flake on silicon. (b) EDX mapping image of gallium, tellurium, silicon (substrate), and oxygen. (c) EDX spectra confirming the presence of gallium and tellurium, in agreement with the ideal atomic ratio of GaTe. No oxygen peak is detected.

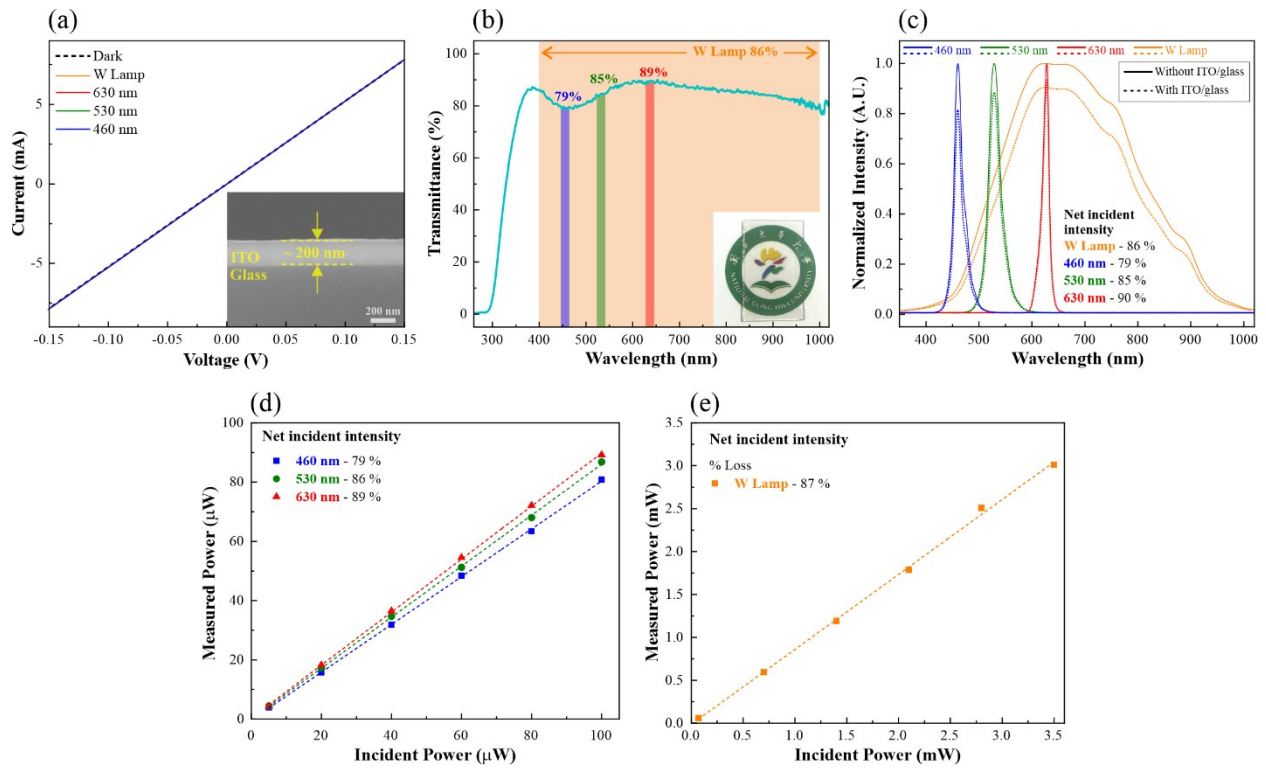

**Figure S2.** Characterization of the ITO-coated glass used as electric contacts for the photodetector device. (a) I-V measurement of ITO/glass electrode showing excellent conductivity, but no response under exposure to light. Inset: SEM image of the ITO/glass substrate used as transparent electrode for the vdW layered GaTe photodetector device. The transparent electrode has a ~200 nm thick layer of conductive ITO, providing good electrical contact for photodetector experiments. (b) Transmittance spectroscopy of the ITO/glass electrodes highlighting the intensity loss at certain wavelengths. Inset: Photo of ITO-coated glass used as the electric contacts. (c) Intensity of the light sources with and without ITO/glass. (d,e) Actual incident power vs measured power, showing good agreement with the values obtained using transmittance spectroscopy.

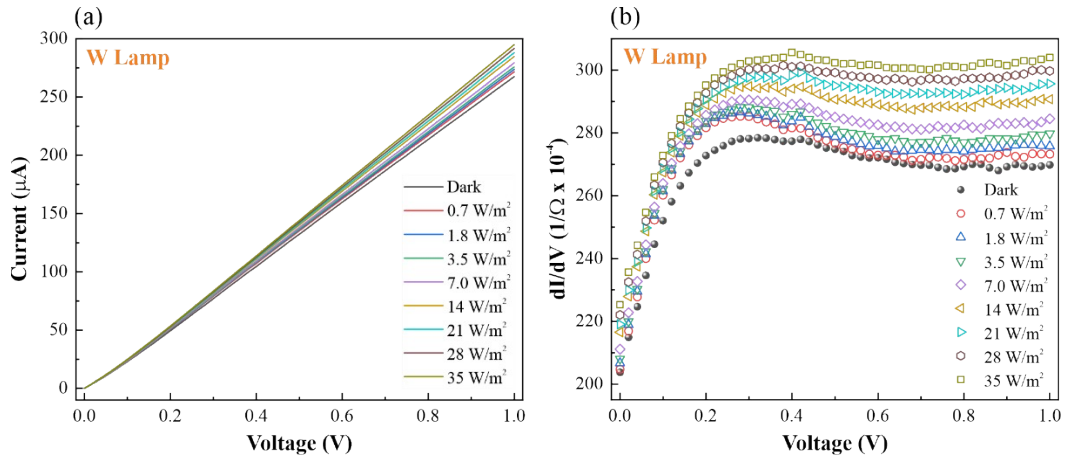

**Figure S3.** Power-dependent I-V measurement of the vdW layered GaTe single crystal under W lamp irradiation. (a) I-V curve of the photodetector device. (b) The corresponding  $dI/dV$  curve under W Lamp irradiation from 0.7  $\text{W}/\text{m}^2$  to 35  $\text{W}/\text{m}^2$ . The power-dependent I-V measurements agrees well with the photoresponse, both indicating that the generated photocurrent is proportional to the irradiation power density

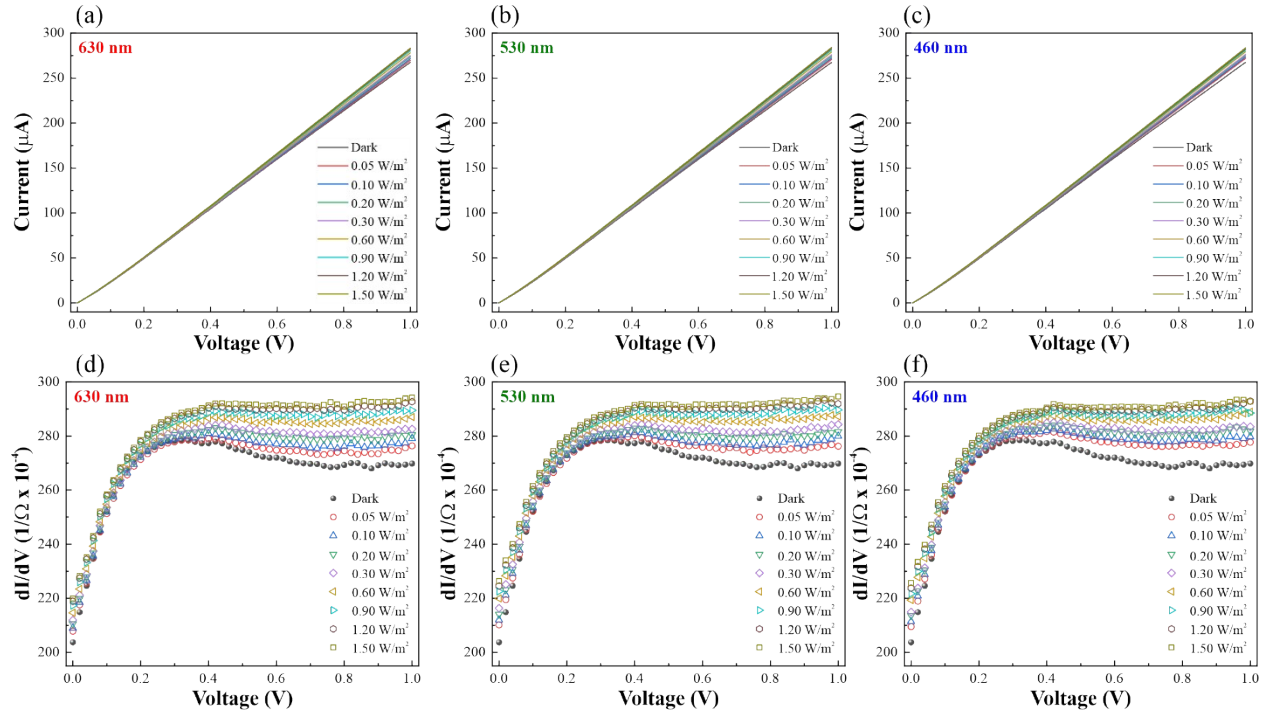

**Figure S4.** Low-power density  $I$ - $V$  measurement of the vdW layered GaTe single crystal. (a-c)  $I$ - $V$  curve of the photodetector device under low-power irradiation ( $0.05 - 1.50 \text{ W/m}^2$ ) at various wavelengths. (b) The corresponding  $dI/dV$  curves under irradiation at 630 nm, 530 nm, and 460 nm from  $0.05 \text{ W/m}^2$  to  $1.5 \text{ W/m}^2$ .

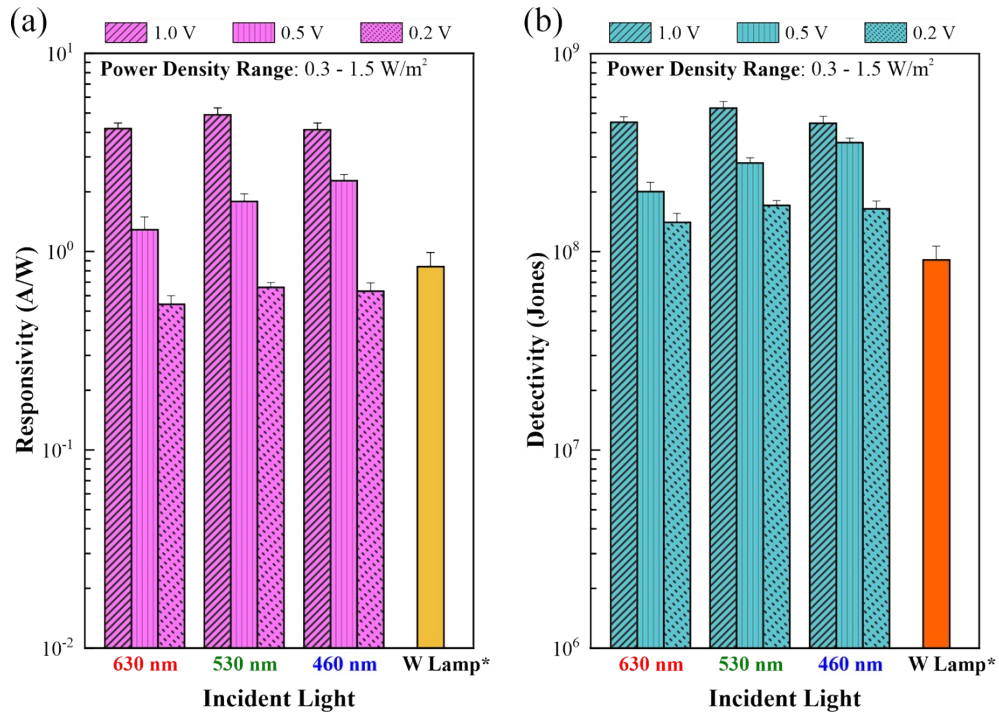

**Figure S5.** Photodetector parameters of the vdW layered GaTe single crystal in the higher power density region. (a) Responsivity of the vdW layered GaTe single crystal at 0.3 – 1.5 W/m<sup>2</sup>. (b) Calculated detectivity from the responsivity data. \*W lamp range is 0.7 – 35 W/m<sup>2</sup> and operated at 1.0 V, included for comparison.

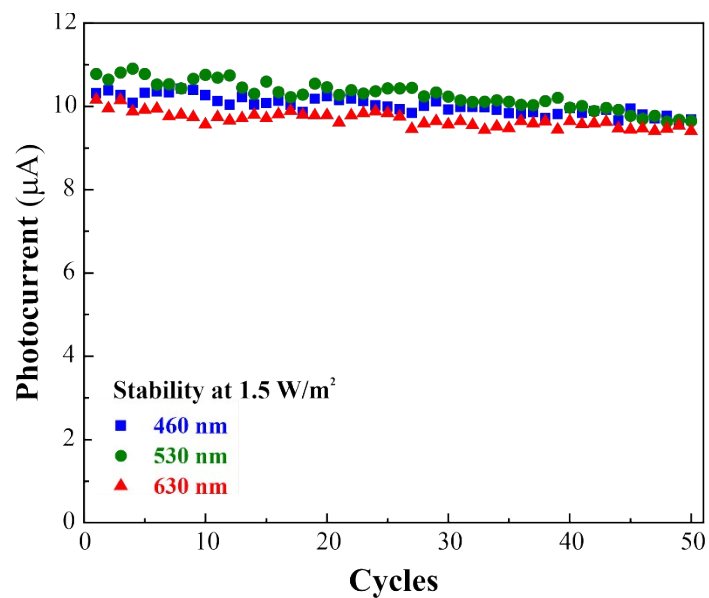

**Figure S6.** Cyclic Stability. Stability of the photodetector device under variable wavelength irradiation at the highest power density (1.5 W/m<sup>2</sup>).

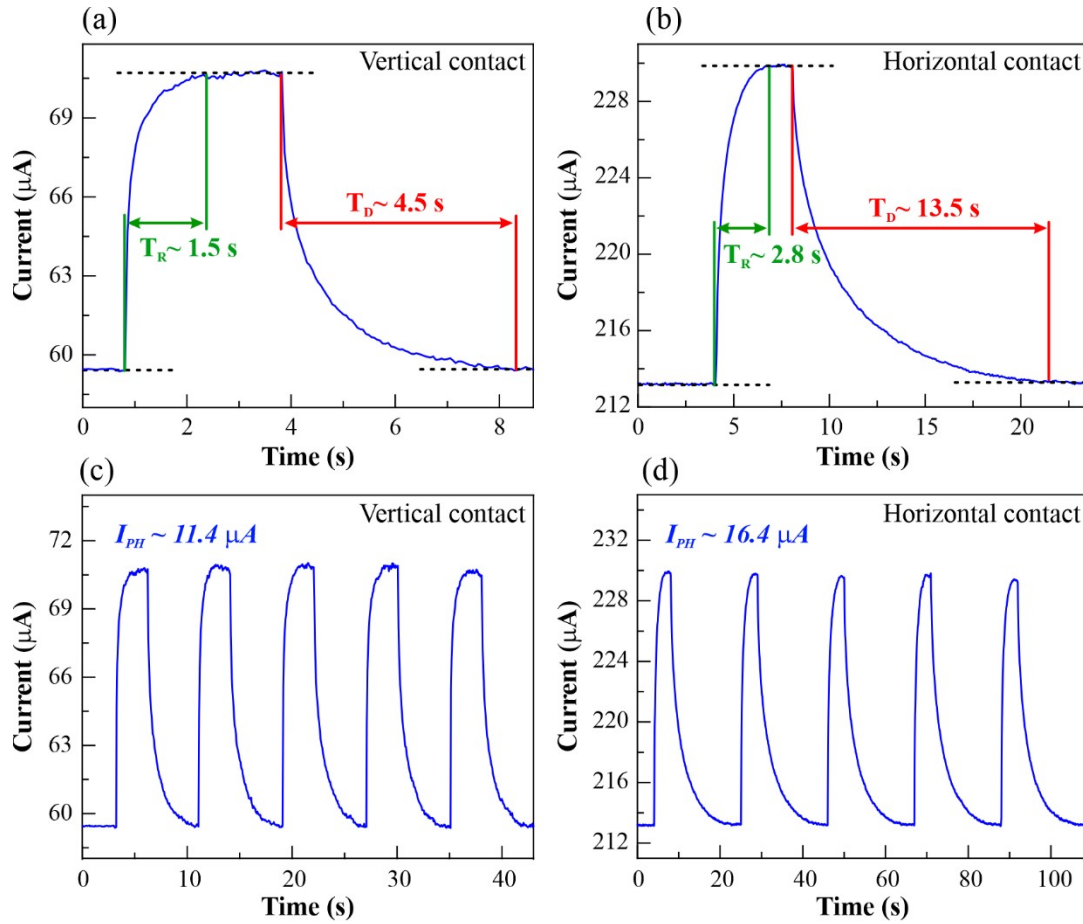

**Figure S7.** Photoresponse of device based on vertical and horizontal contact. Single ON-OFF cycle that shows the response and decay times of (a) vertical contact and (b) horizontal contact. Five ON-OFF cycles of (c) vertical contact and (d) horizontal contact to obtain the average generated photocurrent. Device using vertical contacts exhibit better response time at the cost of reduced photoresponse. This is generally the case for photodetectors due to the inverse relationship between response time and responsivity [1]. In addition, the ITO/glass vertical contacts act as a sealed environment for the vdW layered GaTe single crystal, which is known to degrade in ambient air conditions.



**Table S1: Reports on cyclic stability of GaTe-based photodetectors**

| Material                                 | Power Density (W/m <sup>2</sup> ) | No. of cycles | Ref |
|------------------------------------------|-----------------------------------|---------------|-----|
| Multilayer GaTe FET                      | 29                                | 2             | [2] |
| GaTe nanosheet FET                       | 805                               | 6             | [3] |
| GaTe nanowire FET                        | 32                                | 5             | [4] |
| Multilayer GaTe FET                      | 300                               | 7             | [5] |
| Multilayer GaTe FET                      | 141.3                             | 6             | [6] |
| GaTe Thin Film FET                       | 7300                              | 2             | [7] |
| GaTe nanowire and nanosheet (2-terminal) | 200                               | 1             | [8] |

**Table S2: Two-terminal photodetector device based on 2D chalcogenides and halides**

| Material                                  | Synthesis                                                      | Incident Light (nm)                     | Power (W/m <sup>2</sup> ) | R (A/W)          | D (Jones)              | T <sub>R</sub> / T <sub>D</sub> | Operating Voltage (V)        | Ref              |
|-------------------------------------------|----------------------------------------------------------------|-----------------------------------------|---------------------------|------------------|------------------------|---------------------------------|------------------------------|------------------|
| Graphene/Cu <sub>2</sub> SnS <sub>3</sub> | CVD and spin coating                                           | 850                                     | 1.08                      | 110              | 10 <sup>12</sup>       | 10.2 s / 11.3 s                 | 2.5                          | [9]              |
| GaSe Nanobelt                             | CVD on silicon                                                 | 265                                     | 0.249                     | 663              | -                      | 0.44 s / 3.24 s                 | 3                            | [10]             |
| GaSe Nanosheet                            | 2D Semiconductors, Exfoliated                                  | 380                                     | 3.5                       | 2.6              | 10 <sup>12</sup>       | 0.7 s / 1.2 s                   | 5                            | [11]             |
| GaSe Nanosheet                            | Modified Bridgman                                              | 254                                     | ~ 2 - 10                  | 2.8              | -                      | 0.02 s / 7 s                    | 5                            | [12]             |
| Few layer GaS                             | HQ graphene, exfoliated                                        | 405                                     | 5000                      | 10 <sup>3</sup>  | 10 <sup>12</sup>       | 3 μs / 8.5 μs                   | 2                            | [13]             |
| 2D GaS Film                               | CVD                                                            | 275                                     | 1.02                      | 4.7              | 10 <sup>12</sup>       | 66 ms / 66 ms                   | 20                           | [14]             |
| SnS <sub>2</sub> Nanosheets               | Modified Bridgman                                              | 350-750                                 | 3.6                       | 8.82             | 10 <sup>11</sup>       | 1.2 s / 3 s                     | 2                            | [15]             |
| MoS <sub>2</sub>                          | Moly Hill Mine, Exfoliated                                     | 740                                     | 120                       | ~10              | -                      | 20 s / 21 s                     | 10                           | [16]             |
| MoSe <sub>2</sub>                         | Exfoliation from bulk                                          | 532                                     | 4.4                       | 10 <sup>3</sup>  | 10 <sup>10</sup>       | 33.6 ms / 51.6 ms               | 5                            | [17]             |
| Black phosphorus                          | HQ graphene, exfoliated                                        | 1520-1580                               | 25.1 mW                   | 2.64             | 10 <sup>8</sup>        | -                               | 2                            | [18]             |
| Multilayered WS <sub>2</sub> film         | PLD on silicon                                                 | 635                                     | 180                       | 0.7              | 10 <sup>9</sup>        | 4.1 s / 4.4 s                   | 9                            | [19]             |
| WS <sub>2</sub> nanosheets film           | Hydrothermal intercalation exfoliation of bulk WS <sub>2</sub> | 532                                     | 590.9                     | 0.004            | 10 <sup>9</sup>        | 11.6 s / 7.9 s                  | 5                            | [20]             |
| RuCl <sub>3</sub>                         | CVT                                                            | 1600                                    | 100-200 μW                | 10 <sup>-4</sup> | -                      | 8 ms / 8 ms                     | 1                            | [21]             |
| ReSe <sub>2</sub>                         | CVD on Cu foil                                                 | 530                                     | 27                        | 470              | -                      | 0.5 s / 1.0 s                   | 2                            | [22]             |
| GaTe Nanowire                             | PVT on sapphire                                                | 325-800                                 | 200                       | 460-1580         | ~10 <sup>10</sup>      | ~ few tens of seconds           | 1                            | [8]              |
| <b>Multilayer GaTe</b>                    | <b>Bridgman</b>                                                | <b>W filament + 630, 530, &amp; 460</b> | <b>0.05 – 35</b>          | <b>15.1-17.8</b> | <b>~10<sup>9</sup></b> | <b>1.4 s / 2.6 s</b>            | <b>V = 0.2 V, 0.5, 1.0 V</b> | <b>This work</b> |

## References

- [1] K.S. Reddy B, S. Veeralingam, P.H. Borse, S. Badhulika, *J. Alloy. Compd.* 2022, 919, 165775 <https://doi.org/10.1016/j.jallcom.2022.165775>
- [2] P. Hu, J. Zhang, M. Yoon, X.-F. Qiao, X. Zhang, W. Feng, P. Tan, W. Zheng, J. Liu, X. Wang, J.C. Idrobo, D.B. Geohegan, K. Xiao, *Nano Res* 2014, 7, 694-703 <https://doi.org/10.1007/s12274-014-0430-2>
- [3] Z. Wang, M. Safdar, M. Mirza, K. Xu, Q. Wang, Y. Huang, F. Wang, X. Zhan, J. He, *Nanoscale* 2015, 7, 7252-7258 <https://doi.org/10.1039/C4NR07313D>
- [4] G. Yu, Z. Liu, X. Xie, X. Ouyang, G. Shen, *J. Mater. Chem. C* 2014, 2, 6104-6110 <https://doi.org/10.1039/C4TC00917G>
- [5] F. Liu, H. Shimotani, H. Shang, T. Kanagasekaran, V. Zolyomi, N. Drummond, V.I. Fal'ko, K. Tanigaki, *ACS Nano* 2014, 8, 752-760 <https://doi.org/10.1021/nn4054039>
- [6] Z. Wang, K. Xu, Y. Li, X. Zhan, M. Safdar, Q. Wang, F. Wang, J. He, *ACS Nano* 2014, 8, 4859-4865 <https://doi.org/10.1021/nn500782n>
- [7] J. Kang, V.K. Sangwan, H.-S. Lee, X. Liu, M.C. Hersam, *ACS Photonics* 2018, 5, 3996-4002 <https://doi.org/10.1021/acsp Photonics.8b01066>
- [8] L.-C. Tien, Y.-C. Shih, C.-Y. Chen, Y.-T. Huang, R.-S. Chen, *J Alloy Compd.* 2021, 876 <https://doi.org/10.1016/j.jallcom.2021.160195>
- [9] S.M. Yadav, A. Pandey, *IEEE Trans. Electron Devices* 2019, 66, 3417-3424 <https://doi.org/10.1109/TED.2019.2922698>
- [10] C.Y. Wu, M. Wang, J. Li, Y. Le, W. Fei, J.G. Hu, D. Wu, Y.X. Zhou, L.B. Luo, *Small* 2022, 18, 2200594 <https://doi.org/10.1002/sml.202200594>

- [11] S. Sorifi, M. Moun, S. Kaushik, R. Singh, *ACS Appl. Electron. Mater.* 2020, **2**, 670-676  
<https://doi.org/10.1021/acsaelm.9b00770>
- [12] P. Hu, Z. Wen, L. Wang, P. Tan, K. Xiao, *ACS Nano* 2012, **6**, 5988-5994  
<https://doi.org/10.1021/nm300889c>
- [13] W. Zhong, Y. Liu, X. Yang, C. Wang, W. Xin, Y. Li, W. Liu, H. Xu, *Mater. Des.* 2021, 212  
<https://doi.org/10.1016/j.matdes.2021.110233>
- [14] Y. Lu, J. Chen, T. Chen, Y. Shu, R.J. Chang, Y. Sheng, V. Shautsova, N. Mkhize, P. Holdway, H. Bhaskaran, J.H. Warner, *Adv. Mater.* 2020, **32**, 1906958  
<https://doi.org/10.1002/adma.201906958>
- [15] S.M. Yadav, A. Pandey, *IEEE Trans. Electron Devices* 2022, **69**, 1889-1893  
[10.1109/TED.2022.3148966](https://doi.org/10.1109/TED.2022.3148966)
- [16] P. Gant, P. Huang, D. Pérez de Lara, D. Guo, R. Frisenda, A. Castellanos-Gomez, *Mater. Today* 2019, **27**, 8-13 <https://doi.org/10.1016/j.mattod.2019.04.019>
- [17] W. Lu, J. Ning, Y. Zhou, J. Dong, C. Yan, X. Shen, C. Zhang, D. Wang, J. Zhang, Y. Hao, *J. Alloys Compd.* 2021, 865 <https://doi.org/10.1109/TED.2022.3148966>
- [18] Y. Xue, X. Wu, K. Chen, J. Wang, L. Liu, *Opt. Mater. Express* 2022, 13  
<https://doi.org/10.1364/OME.477278>
- [19] J.D. Yao, Z.Q. Zheng, J.M. Shao, G.W. Yang, *Nanoscale* 2015, **7**, 14974-14981  
<https://doi.org/10.1039/C5NR03361F>
- [20] J. Li, J. Han, H. Li, X. Fan, K. Huang, *Mater. Sci. Semicond. Process.* 2020, 107  
<https://doi.org/10.1016/j.mssp.2019.104804>

- [21] M.K. Jo, H. Heo, J.H. Lee, S. Choi, A. Kim, H.B. Jeong, H.Y. Jeong, J.M. Yuk, D. Eom, J. Jahng, E.S. Lee, I.Y. Jung, S.R. Cho, J. Kim, S. Cho, K. Kang, S. Song, *ACS Nano* 2021, **15**, 18113-18124 <https://doi.org/10.1021/acsnano.1c06752>
- [22] B. Silva, J. Rodrigues, B. Sompalle, C.D. Liao, N. Nicoara, J. Borme, F. Cerqueira, M. Claro, S. Sadewasser, P. Alpuim, A. Capasso, *Nanomaterials* 2021, 11 <https://doi.org/10.3390/nano11071650>
